# Supplementary material for: Bumblebees (Bombus terrestris) Improve ‘Hass’ Avocado (Persea americana) Pollination
Source: MDPI journal article supplement (doi:10.3390/plants10071372), 2021-07-05
Supplement: s1 [file s1]

**Table S1.** List of the primers used in this study. For each of the 24 SNPs, we specified the amplicon sequences as well as its two alleles and the contig where the SNP is located (see Rubinstein et al., 2020). For each SNP - Specific Target Amplification primers (STAs), Locus Specific primers (LSPs) and Allele Specific primers (ASPs) are provided.

| SNP | Name             | Contig           | Position | Allele1 | Allele2 | STRAND  | STA_primer                       | LSP_primer                      | ASP1_primer                       | ASP2_primer                       | AMPLICON_SEQ                                                                                                                      |
|-----|------------------|------------------|----------|---------|---------|---------|----------------------------------|---------------------------------|-----------------------------------|-----------------------------------|-----------------------------------------------------------------------------------------------------------------------------------|
| 1   | AV 003<br>301_10 | g30150t<br>00001 | 810      | C       | T       | forward | CATTCAAAACAACCA<br>GTGAATAGATTAG | TCTCAGACTGCTTTGG<br>CTTCTCC     | TGGGGCACAATAAAGG<br>GATGCC        | TGGGGCACAATAAAGG<br>GATGCT        | CATTCAAAACAACCAAGTGAATAGATTAGGAGCTGGGCGAAGAG<br>GGTGGGGCACAATAAAGGGATGC[T/C]AGGGATGGAGGAGTC<br>AGTGAGGGAGAAGCCAAAGCAGTCTGAGA      |
| 2   | AV 005<br>099_40 | g09915t<br>00001 | 540      | A       | G       | forward | CCAGTCAAAATGCCCT<br>GAAGAAA      | TGACTCTGATAGTTG<br>GAGTGATTCTTG | CTAAGATCTACCATGAT<br>ACTTCCGACATA | CTAAGATCTACCATGAT<br>ACTTCCGACATG | CCAGTCAAAATGCCCTGAAGAACTCGAGCAGCAGGATGGCTA<br>AGATCTACCATGATACTTCCGACAT[G/A]CTTTAAACATGGCAGT<br>TCAAGAATCACTCCAATATCAGAGTCA       |
| 3   | AV 011<br>221_46 | g22101t<br>00001 | 1346     | C       | G       | reverse | AATGATATGGCTTGTT<br>AAAACGCTT    | GTCCTGAATCCGATC<br>GAAGTAAGTAC  | TCTTGTCAGGTCCTTAG<br>CCTCCTG      | TCTTGTCAGGTCCTTAG<br>CCTCCTC      | AATGATATGGCTTGTTAAACGCTTCTTGTCAGGTCCTAGCCTC<br>CT[G/C]TTTCCATGTGAGTACTTCTCGATCGGATTCAGGAC                                         |
| 4   | AV 012<br>267_37 | g26796t<br>00001 | 137      | C       | T       | reverse | GCATGGCCACTCTAG<br>CCCA          | AGGTCCACTTTGAGC<br>CCCTATTAT    | CGGAGAGGCCCTTTCAT<br>AACC         | CGGAGAGGCCCTTTCAT<br>AACC         | GCATGGCCACTCTAGCCACGGAGAGGCCCTTTCATAACC[A/G]<br>AGACTGATAAATAGGGGCTCAAAGTGGACCT                                                   |
| 5   | AV 024<br>157_50 | g15753t<br>00001 | 550      | C       | G       | reverse | GAAATCCCCAAAACCTC<br>ATCAAATAA   | GTGAAGAGAAGGAA<br>GATAACTGGAGAG | CCCTCTCTTTGCCTTTCA<br>ACTCG       | CCCTCTCTTTGCCTTTCA<br>ACTCC       | GAAATCCCCAAAACCTCATCAAATAACCTTTTTATGAATTCCTC<br>CCCTCTCTTTGCCTTTCAACTC[G/C]TCTTTCTATCTATTAGATGA<br>AGATCTCTCCAGTTATCTTCTCTCTTCTAC |
| 6   | AV 038<br>262_46 | g26200t<br>00001 | 546      | A       | T       | reverse | TGTACTCACTCACCTT<br>CTTCTTTTC    | AGATCCCATGGCACG<br>TTGATCG      | CCACCACCTTCGTCGTG<br>CCT          | CCACCACCTTCGTCGTG<br>CCA          | TGTACTCACTCACCTTCTTCTTTTCCAATTTTGGGCCAATGCCAC<br>CACCTTCGTGTCGCC[T/A]GCTGAGATCTTCCCTGCGAGGCTGC<br>GATCAACGTGCCATGGGATCT           |
| 7   | AV 054<br>048_97 | g04881t<br>00001 | 897      | A       | C       | reverse | CCAAGCTCACTAATAA<br>GCACGC       | TTGACATAATTGGAG<br>GGAATGCTCG   | GAAAGATGCCAAAGTAC<br>TTCACGCT     | GAAAGATGCCAAAGTACT<br>TCACGCG     | CCAAGCTCACTAATAAGCACGCGTACTTCAGAAAGATGCCAAAG<br>TACTTCACGC[T/G]CAGGAGCATTCCCTCCAATTATGTCAA                                        |
| 8   | AV 057<br>210_87 | g21033t<br>00001 | 1087     | A       | G       | reverse | GTCATGACTACTAGCC<br>TCAACTTAG    | CATACCTGATGGGTG<br>CCTTGAACC    | AAAAGTATATGCCTAT<br>GAAGCCTTCT    | AAAGTATATGCCTATG<br>AAGCCTTCC     | GTCATGACTACTAGCCTCAACTTAGCTAAGGCTGTGCAGAAAC<br>TGATATGCCTATGAAGCCTT[C/T]ATGCCGCTTCAACCAAGTCA<br>GGTTCAAGGCACCATCAAGTATG           |
| 9   | AV 058<br>213_34 | g21382t<br>00001 | 834      | C       | T       | forward | GCAATCATGGTGCAA<br>ATAACACAA     | GTGGGAGATGAGGTA<br>TAGGATCGC    | GCCCCTCGCAGCCTCCA<br>AC           | GCCCCTCGCAGCCTCCA<br>AT           | GCAATCATGGTGCAAATAACACAAGCCCTCGCAGCCTCAA[T/<br>C]GCGATCCTATACCTCATCTCCAC                                                          |
| 10  | AV 078<br>076_17 | g07659t<br>00002 | 517      | A       | T       | reverse | ATTAATACCTGTGTT<br>AGGTTGAGAA    | CGCCACATCAGGAA<br>AAGATTCATA    | AAATGGAAGGTTCTTT<br>CACTGCCT      | AAATGGAAGGTTCTTT<br>CACTGCCA      | ATTAATACCTGTGTTGAGGTTGAGAAATGGAAGGTTCTTTC<br>ACTGCC[A/T]GGTTATGAATCTTTCTGATGTGGGCG                                                |
| 11  | AV 081<br>109_35 | g10924t<br>00001 | 235      | A       | C       | forward | CATGGAGTAGGAATA<br>GTAGTTTTAAAC  | TCCTACATATGTATGT<br>ATGAGGGAGGG | AAAGATATGGCCATTAA<br>CGGGTTGA     | AAAGATATGGCCATTAA<br>CGGGTTGC     | CATGGAGTAGGAATAGTAGTTTTAAACACTAGATAATCAAAGTT<br>GACAAAGATATGGCCATTAAACGGGTTG[C/A]TACAAATCTCAA<br>CCCCCTCCCTCATACATACATATGTAGGA    |
| 12  | AV 087<br>055_34 | g05557t<br>00001 |          |         |         |         | GCTCCTTCTGTGCTC<br>ACTTT         | TCAGAATGTTCACAAT<br>TCAGGCGG    | GAAGAGTTCTAGGGATT<br>AAGCTATTGTTA | GAAGAGTTCTAGGGATT<br>AAGCTATTGTT  | GCTCCTTCTGTGCTCACTTTCAAGTAGTCAAGAAGAAGAGTT<br>CTAGGGATTAAGCTATTGTT[C/A]GTGGGTTGTAATTCTGCCG<br>CCTGAATTGTGAACATTCTGA               |
| 13  | AV 088<br>277_95 | g27701t<br>00001 |          |         |         |         | CTCCTTCCCTACACCT<br>ATTACACA     | GGGGTTCAATCATCA<br>AACTTCACATG  | AAATCCATACATGATG<br>GCTGAGTACA    | AAATCCATACATGATG<br>CTGAGTACG     | CTCCTTCCCTACACCTATTACACACTACCATCTAGATCGTATAAA<br>AATCCATACATGATGGCTGAGTAC[A/G]TTAAGGACGTCAAAGC<br>ATGTGAAGTTTGATGATTGAACCC        |
| 14  | AV 101<br>088_32 | g08815t<br>00002 |          |         |         |         | ATCCCTTGATATCAAT<br>TCATTGGAGA   | CTGCGCGATATTCTG<br>GCTAAAAAAG   | GTAAGCCCCGGCATCAA<br>ACCT         | GTAAGCCCCGGCATCAA<br>ACCG         | ATCCCTTGATATCAATTCATTGGAGAATGTAAGCCCCGGCATCA<br>AACC[T/G]CGCTTTTTAGCCAGAATATCGCGCAG                                               |

|    |                  |                  |                                                                                 |                                                               |                                                          |                                                                                                                                     |
|----|------------------|------------------|---------------------------------------------------------------------------------|---------------------------------------------------------------|----------------------------------------------------------|-------------------------------------------------------------------------------------------------------------------------------------|
| 15 | AV 103<br>131_12 | g13103t<br>00001 | TCATCATAACCCAATG<br>ACACACTG                                                    | AATGGTCCCCACTTTG<br>AGTCTGG                                   | TCATCGTCGTCGTTGTTATCATCGTCGTCGTTGTTA<br>GACACA<br>GACACT | TCATCATAACCCAATGACACACTGCCATGCGTCCCCTGATCATCA<br>TCGTCGTCGTTGTTAGACAC[A/T]GTGGATGAAACATCAATGGC<br>ATCCCCAGACTCAAAGTGGGGACCATT       |
| 16 | AV 107<br>214_11 | g21486t<br>00001 | TCTGGGAAACAGGTT<br>TTCTGAGA                                                     | TCGATGTCATCCATGA<br>TTCGTAGAAC                                | ATGTCCTTGAAAGAAGC<br>AGCTGAAG<br>AGCTGAAT                | TCTGGGAAACAGGTTTTCTGAGAAGGAATGGCGTAGGTTTTTA<br>TGTCCTTGAAAGAAGCAGCTGAA[T/G]TGACGGTTCCAGGTTTT<br>TTGAAGGTTCTACGAATCATGGATGACATCGA    |
| 17 | AV 108<br>249_68 | g24900t<br>00001 | TGTTTGTACCATGTGAGAGATTTTCTGGCGCTTCTCTCAGATTTTAAAAATTCCTCAGATTTTAAAAAT<br>CCCCAA | GATGGTG                                                       | GACAACAGCTA<br>GACAACAGCTC                               | TGTTTGTACCATGTGACCCCAAAATAATAGTACAGACAGTCCTC<br>AGATTTTAAAAATGACAACAGCT[C/A]CAATGGGTCCAGTCAAG<br>ACACCATCAGCGCCAGAAAATCTC           |
| 18 | AV 114<br>003_23 | g00342t<br>00001 | TGGGAAAACCTAAA<br>CAAGTTCG                                                      | GATCTCCGGCGTTTAC<br>TGAGC                                     | GCAGCGCACATCTTGCA<br>GGT<br>GGA                          | TGGGAAAACCTAAACAAGTTCGAGCGCACATCTTGCAAGG[A/<br>T]CGCGCGCATCACC GGCTCAGTGAACGCCGGAGATC                                               |
| 19 | AV 121<br>031_57 | g03109t<br>00001 | AGACTGTAGAACTG<br>AGACTGGC                                                      | TGAGGGTTTCTCTCAG<br>GTTACGTTT                                 | CCGGAAGAATCCTATTT<br>TAAGTATTCA<br>TAAGTATTCT            | AGACTGTAGAACTGAGACTGGCCGGTGAAGCGTAGCGTCCG<br>GAAGAATCCTATTTTAACTGATTC[T/A]GGGTCAATTTGAAAAGCC<br>CAAACGTAACCTGAGGAAACCTCA            |
| 20 | AV 146<br>072_75 | g07246t<br>00001 | GGATAGCATCACAAT<br>CTCATCAAAA                                                   | TGGGCTTCATTTAGAC<br>TTCCTGTTTT                                | AACTTTGTTAGAATAAG<br>CGAAATATACAGTAC<br>CGAAATATACAGTAT  | GGATAGCATCACAATCTCATCAAAAACCTTTTAAAGCAACTTTG<br>TTAGAATAAGCGAAATATACAGTA[C/T]AAGAGATGTATTTTG<br>AAAAACAGGAAGTCTAAATGAAGCCCA         |
| 21 | AV 166<br>149_06 | g14937t<br>00001 | TGACAAAGCTTTCTTA<br>TTTATATATGTGAA                                              | AGTCTATATAGGTTGT<br>ATGAAGTCAGGAC                             | ATGATCAAAGACCTAAC<br>AACCTTCTGT<br>AACCTTCTGA            | TGACAAAGCTTTCTTATTTATATATGTGAAAAAAGAAGTCAATG<br>AGAATGATCAAAGACCTAACACCTTCTG[A/T]GCCAAAAGTGG<br>TCCTGACTTCATACAACCTATATAGACT        |
| 22 | AV 167<br>054_69 | g05485t<br>00002 | CAAAAGCAAACTTTTATTCTCTGTAGAAAGTA<br>TTGAGTGCC                                   | AGTAACAAAACAAAAT<br>GGCGGGT<br>ATTCTTCATGCCG<br>ATTCTTCATGCCT | AGTAACAAAACAAAAT<br>ATTCTTCATGCCG<br>ATTCTTCATGCCT       | CAAAAGCAAACTTTTATTGAGTGGCTAACAGTACAAGTAACAAA<br>ACAAAAATATTCTTCATGCC[G/T]ATCTATAGCAGAGGGCTCAC<br>GCCACCCGCTACTTCTACAGAGGAA          |
| 23 | AV 169<br>254_87 | g25456t<br>00001 | GAGAAGACTACAAGA<br>AGTTGAGAGG                                                   | AATTGAAGGTACGTC<br>CAAACAGGC                                  | AAGTTCTGAAGGTATTT<br>CTTATGTGTG<br>CTTATGTGTG            | GAGAAGACTACAAGAAGTTGAGAGGTCTTTGCTAACAGTTCT<br>GAAGGTATTTCTTATGTGTG[C/T]GGTTGTCAATCTCAGGGCCT<br>GTTTGGACGTACCTTCAATT                 |
| 24 | AV 188<br>021_32 | g02123t<br>00003 | CTCTTTGAATAATTCT<br>TCCCTCAACC                                                  | GTGCAAAATTCCTACC<br>TACCAATTGG                                | TCTTGGAATTTGGATCC<br>AGATAACTTTA<br>AGATAACTTTC          | CTCTTTGAATAATTCTTCCCTCAACCAGAAATCTTAGAATAGCTC<br>TTGGAATTTGGATCCAGATAACTTT[A/C]TCAAGTATACCATGAC<br>GTGCTGGCCAATTGGTAGGTAGGAATTTGCAC |
